# Supplementary material
Source: MDPI journal article supplement (https://www.mdpi.com/1999-4907/12/9/1251)
Supplement: s1 [file s1 › forests-1367995-supplementary.pdf]

# SUPPLEMENTAL MATERIAL 1

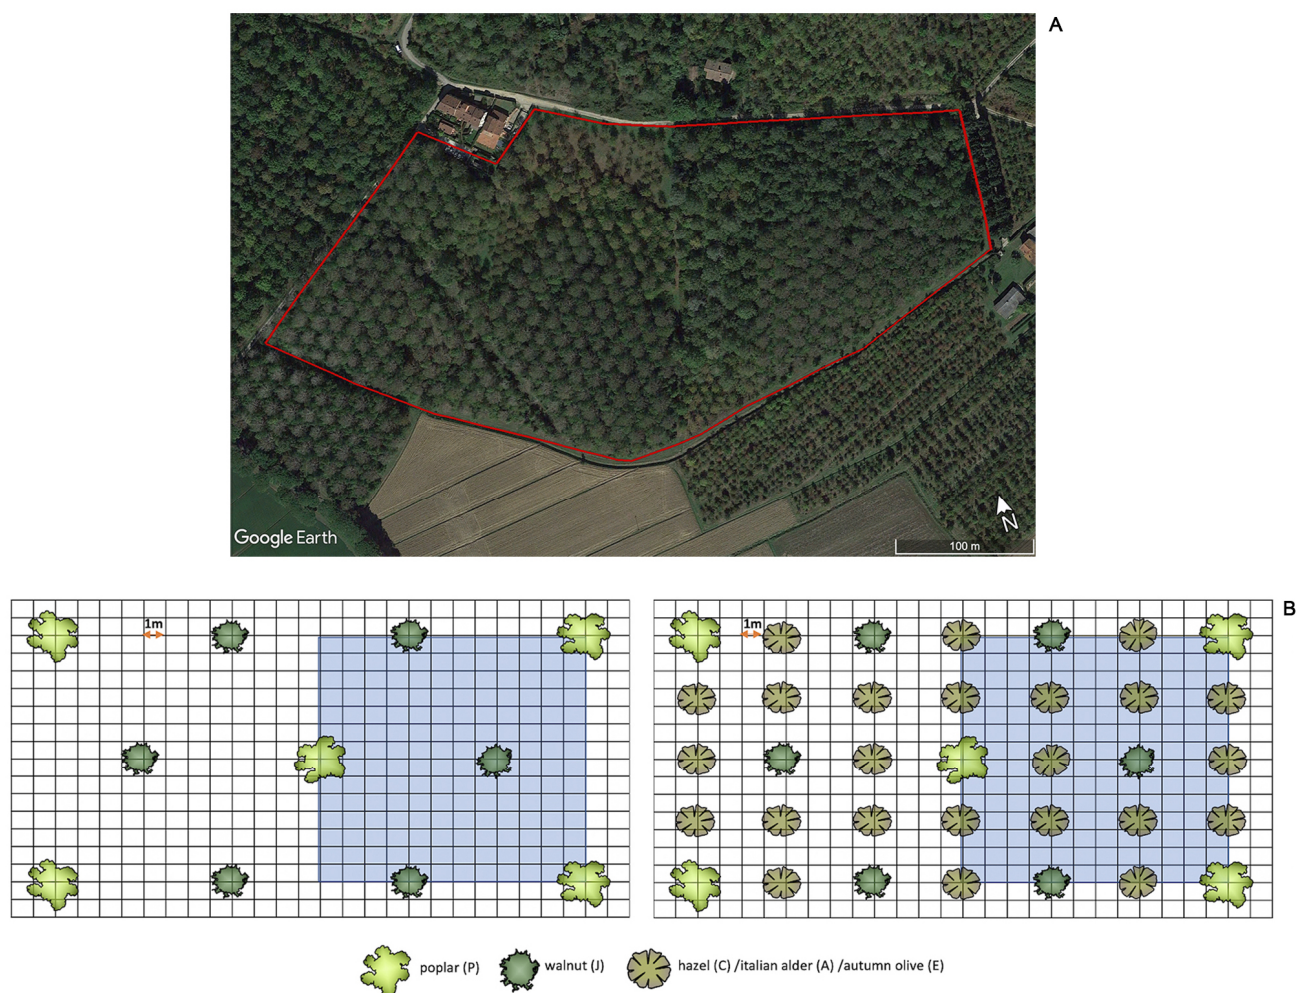

**Figure S1.** (A) Study area in which four intercropping systems were compared using a randomized blocks design with three replications. Photo modified by Google Earth. (B) Planting layout of the different intercropping. On the left poplar and walnut intercropping, on the right poplar and walnut intercropped respectively with hazel, Italian alder and autumn-olive.
